# Supplementary material for: Corni Fructus Containing Formulation Attenuates Weight Gain in Mice with Diet-Induced Obesity and Regulates Adipogenesis through AMPK
Source: Hindawi journal article supplement (doi:10.1155/2013/423741), 2013-01-01

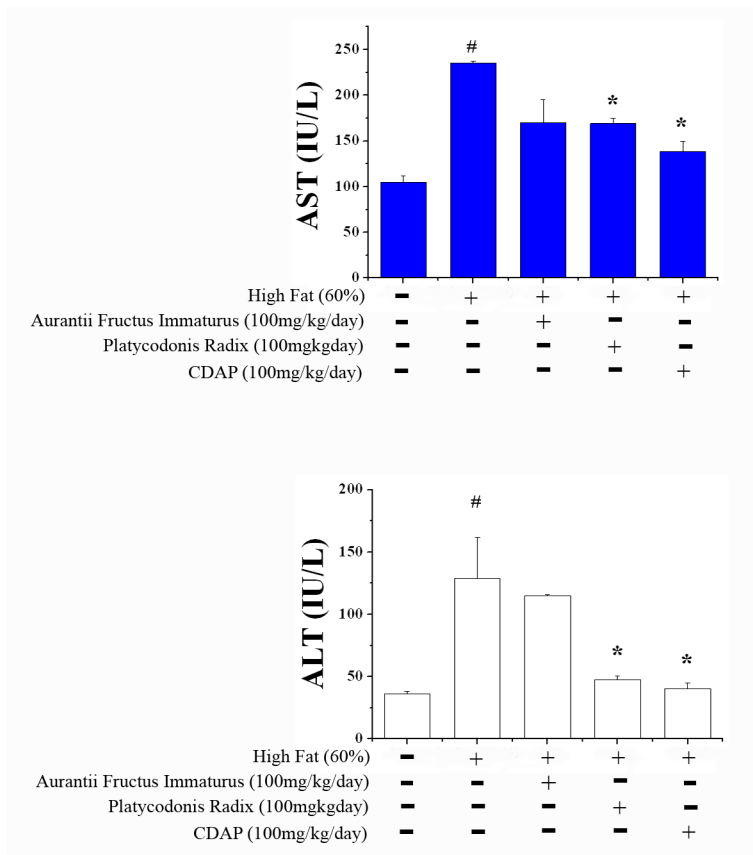

Supplement: f1 [file 423741.f1.pdf]
